# Supplementary material for: Pentadecapeptide BPC 157 and the central nervous system
Source: PubMed Central journal article supplement — Neural Regen Res. 2021 Aug 4;17(3):482–7. doi: 10.4103/1673-5374.320969 (PMC8504390; doi:10.4103/1673-5374.320969), 2021-08-04
Supplement: NRR-17-482_Suppl2.pdf [file NRR-17-482_Suppl2.pdf]

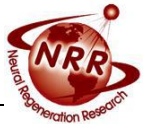

## OPEN PEER REVIEW REPORT 2

**Name of journal:** Neural Regeneration Research

**Manuscript NO:** NRR-D-20-00944

**Title:** Pentadecapeptide BPC 157 and the central nervous system

**Reviewer's Name:** Brijesh Kumar Singh

**Reviewer's country:** USA

### COMMENTS TO AUTHORS

In the article titled "Pentadecapeptide BPC 157 and the central nervous system" author impressively compiled the information about BPC157 and broadly elaborated its positive impact on brain and spinal cord associated anomalies. Authors also focused on the stability of BPC157 and its therapeutic potential that improves behavioral deficits. This article requires minor revision-

1. Authors have used 'Pentadecapeptide BPC 157' at several places, 'BPC 157' should be good as short form.
2. Citations in between sentences create difficulties to understand what authors want to convey.

Altogether, after these minor corrections, manuscript would seem in good shape.
